32  
33  
34  
35  
36  
37  
38  
39  
40  
41  
42  
43  
44  
45  
46  
47  
48  
49  
50  
51  
52

## Abstract

Stem cells are the ultimate source of the cells in various tissues and organs, and thus are essential to postembryonic plant growth and development. SCARECROW (SCR) is a plant-specific transcription regulator well known for its role in stem-cell renewal in plant roots, but the mechanism by which SCR exerts this function is still unclear. To address this question, we carried out a genetic screen for mutants that no longer express SCR in the stem-cell niche in the *Arabidopsis* root, and one of the mutants is characterized herein. Using marker-assisted mapping, whole genome sequencing, and complementation tests, we pinpointed the causal mutation in this mutant at *TEN1*, which encodes telomere-end protecting factor. By sequence alignment of *TEN1* homologs in a wide range of eukaryotes, we identified two novel motifs. The importance of these motifs was examined through site-directed mutagenesis of a conserved amino acid, and through complementation tests, which showed that G100 is required for *TEN1* stability. Interestingly, we found that *TEN1* expression was dramatically reduced in the *scr* mutant. Two components in the same protein complex as *TEN1*, *STN1* and *CTC1*, were found to be also dramatically downregulated in *scr*, as well as telomerase. Further studies showed that loss of *STN1*, *CTC1* and telomerase also caused defects in the root stem cells. In line with these findings, the *scr* mutant was hypersensitive to DNA damage reagents such as Zeocin. These results together suggest that SCR maintains root stem cells by promoting expression of genes that ensures genome integrity.

53  
54  
55  
56  
57  
58  
59  
60  
61  
62  
63  
64  
65  
66  
67  
68  
69  
70  
71  
72  
73  
74  
75

## Introduction

Postembryonic growth and development in higher plants relies on two populations of stem cells, one at the root tip and the other at the shoot tip. Located at the center of the root tip, the quiescent center (QC) is the ultimate source of all root cells and is therefore considered the very stem cell of the root (Fig 1A). The QC is surrounded by cells that also have stem cell properties but give rise to various cell types, and together these cells constitute the so called stem cell niche (SCN) (Benfey and Scheres, 2000), in which the QC acts as the organizing center (Dolan et al., 1993; van den Berg et al., 1997). Daughter cells of the SCN are mitotically much more active, forming a zone of dividing cells named the root apical meristem (RAM), which is adjoined by the elongation zone (Fig 1A). Due to its critical importance in root growth, the SCN has been the subject of extensive research, and many factors involved in SCN maintenance have been identified in the model plant *Arabidopsis thaliana*, such as the *PLETHORA* family genes (Aida et al., 2004); *WOX5*, a *WUSCHEL* family transcription factor specifically expressed in the QC (Sarkar et al., 2007); and TCP family members TCP20 and TCP21 (Shimotohno et al., 2018).

Telomere protective factors have also been shown to play a pivotal role in stem-cell maintenance. In a genetic screen for mutants with compromised root growth, Hashimura et al. identified a mutant that has a defective SCN and a short root phenotype, which they named *meristem disorganized (mdo1)* (Hashimura and Ueguchi, 2011). MDO1 turns out to be TEN1, which is a component of the CST complex that binds to and protects the telomere (Leehy et al., 2013). The *ten1/mdo1* mutant is hypersensitive to DNA damage reagents, especially cells in the SCN (Hashimura and Ueguchi, 2011). Severe growth retardation and telomere defects were also observed in mutants for CTC1 and STN1, which are components of the CST complex (Song et

76 al., 2008; Surovtseva et al., 2009), suggesting that these two protein may also have an  
77 importance role in stem-cell maintenance.

78 SCR is a member of the plant-specific GRAS family of transcriptional regulators with a  
79 pivotal role in stem cell maintenance and radial patterning in the root of the model plant  
80 *Arabidopsis thaliana* (Di Laurenzio et al., 1996). In the *scr* mutant, QC is lost and SCN becomes  
81 disorganized, resulting in a short root phenotype (Sabatini et al., 2003). In addition to its  
82 important role in stem-cell maintenance, SCR also plays an essential role in radial patterning.  
83 Compared to the wild type, which produces two layers of ground tissue – the endodermis and  
84 cortex – through an asymmetric cell division of the cortex/endodermis initial (CEI) cells (Fig  
85 1A), the *scr* mutant has only a single layer of ground tissue (Di Laurenzio et al., 1996). Because  
86 this mutant cell layer has characteristics of both endodermis and cortex, it has long been thought  
87 that SCR is required only for the asymmetric division of the CEI. However, a recent study  
88 showed that SCR is required for endodermal specification as well, whereby it acts redundantly  
89 with SCL23, a close homolog to SCR (Long et al., 2015a).

90 The mechanism by which SCR regulates ground tissue patterning in *Arabidopsis thaliana*  
91 has been largely elucidated. Acting upstream of SCR is SHR. However, SHR is expressed in the  
92 inner tissue of the root – the stele (Helariutta et al., 2000), unlike SCR, which is expressed  
93 specifically in the QC and endodermis (Di Laurenzio et al., 1996). The SHR protein is a mobile  
94 molecule able to move into the neighboring cells –the QC and endodermis (Nakajima et al.,  
95 2001), where it forms a complex with SCR, enhances SCR expression through a feed forward  
96 loop, and specifies the endodermal cell fate (Cui et al., 2007; Sozzani et al., 2010). In the  
97 meantime, SHR gets trapped in the endodermis and QC as a result of physical interaction with  
98 and nuclear retention by SCR, thus defining a single layer of endodermis (Cui et al., 2007). This

99 mechanism also requires some members of the IDD family of transcription factors, which  
100 physically interact with SHR and SCR as well (Long et al., 2015b; Moreno-Risueno et al., 2015;  
101 Welch et al., 2007).

102 Despite its pivotal role in stem cell maintenance, how SCR executes this role is still poorly  
103 understood. It is clear that expression of SCR in the QC is required for maintenance of the SCN,  
104 but whether and how SCR exerts this role has been unclear (Sabatini et al., 2003). Through  
105 transcriptome analysis, Moubayidin et al. found that cytokinin signaling is elevated in the *scr*  
106 mutant; when a cytokinin signaling was blocked by mutation in *ARR1*, the short root phenotype  
107 of the *scr* mutant is largely rescued owing to a longer RAM (Moubayidin et al., 2013),  
108 suggesting that SCR promotes root growth partially by suppressing cytokinin biosynthesis or  
109 signaling. The SCN in *scr* was also alleviated by *arr1*, as indicated by the restoration of *WOX5*  
110 expression (Moubayidin et al., 2013). However, the rescue is likely to be an indirect effect of  
111 *ARR1* because *ARR1* is mainly expressed in the meristematic cells outside of the SCN.  
112 Moreover, the root of the *arr1 scr* double mutant is still significantly shorter than the wild type,  
113 suggesting the existence of other mechanisms. Recently Shimotohno et al. showed that SCR is  
114 able to form a complex with TCP20 and PLT and together they activate the expression of  
115 *WOX5*, thus maintaining the SCN (Shimotohno et al., 2018). Although the *tcp20* mutant  
116 enhances the SCN defect in *scr*, it alone does not disturb the SCN and root growth (Shimotohno  
117 et al., 2018). In a recent study we also showed that SCR has a role in promoting cell elongation  
118 and meristematic activity by maintaining redox homeostasis, but this does not seem to be  
119 relevant to SCN (Fu et al., 2021). These studies suggest that additional mechanisms exist for  
120 SCR in SCN maintenance.

121 The notion that SCR functions differently in the SCN and RAM is supported by other  
122 studies. Using a promoter-bashing approach, Kobayashi et al revealed that the SCR promoter  
123 contains two cis-regulatory modules with distinct functions: one for QC expression, and the other  
124 for endodermal expression (Kobayashi et al., 2017). The factors that bind to these cis-regulatory  
125 motifs cannot be SHR, not only because SHR is present in the QC and endodermis, but also  
126 because it does not have a DNA binding domain. Members of the IDD family of transcription  
127 factors could fit this role, but most IDD genes studied so far appear to be solely involved in  
128 ground tissue patterning (Long et al., 2015b; Moreno-Risueno et al., 2015; Welch et al., 2007).  
129 The only IDD factor known to be essential to stem cell maintenance is JKD, but the *jdk* mutant  
130 has only slightly shorter root than the wild type (Welch et al., 2007), which suggests the  
131 existence of additional factors that maintain the SCN.

132 Understanding the mechanism by which SCR maintains SCN necessitates the identification  
133 of factors that act upstream and downstream of SCR. We therefore have designed a genetic  
134 screen that allows us to identify mutants that affect SCR expression in the QC, but not in the  
135 endodermis. Several mutants fitting this criterium were obtained, and characterization of one of  
136 them is described in this report. Through marker-assisted crude mapping, whole genome  
137 resequencing, and functional complementation tests, we located the gene with the causal  
138 mutation *TEN1*, which encodes a component of the CST complex that protects telomere ends  
139 (Shay and Wright, 2019). Interestingly, we found that TEN1 expression was dramatically  
140 reduced in the *scr* mutant. The other components of the CST complex, STN1 and CTC1, were  
141 also affected in *scr*, as was telomerase. These findings along with other relevant experiments  
142 suggest that SCR maintains the stem cell niche by ensuring telomere integrity. In addition, we

143 have identified two evolutionarily conserved motifs in TEN1 and provided evidence that one of  
144 them has an essential role in TEN1 function.

145

## 146 **Results**

147

148 1. A genetic screen for genes involved in the SCR pathway identified a mutant defective in root  
149 stem-cell maintenance

150 To identify factors that are involved in the SCR developmental pathway, we carried out an  
151 EMS (ethyl methanesulfonate) mutagenesis with seeds homozygous for a transgene expressing a  
152 GFP-SCR fusion protein under the control of the *SCR* promoter in the Columbia-0 (Col-0)  
153 background (*SCRpro:GFP-SCR, scr-1*). From 10,000 mutagenized seeds several mutants that no  
154 longer express GFP-SCR in the QC were obtained. One of these mutants, numbered 74, was  
155 chosen for further characterization in this study due to its apparent root growth defect (Fig 1B).  
156 In this mutant, GFP signal was lost not only in the QC but also in some endodermal cells close to  
157 the QC (Fig 1C), which suggests that the mutation affects the stem cell niche (SCN). Consistent  
158 with this observation, we found that cells in SCN became disorganized (Fig 1C). In addition to  
159 the SCN and root growth defects, the mutant also displayed abnormal phenotypes in the shoot,  
160 such as short stature, fasciated inflorescence, extra branching, and clustered flowers (Fig S1, A  
161 and B). Seed development was affected as well, as some seeds were quite small and did not  
162 germinate (Fig S1C).

163 To determine whether the mutation responsible for the SCN defect was attributable to a  
164 single gene or multiple genes, we crossed the mutant with wild type Col-0 and scored seedlings  
165 without GFP signals in the QC in the F2 segregation population. Intriguingly, among 404 F2

166 seedlings, only 19 seedlings could be reliably identified as mutant, resulting in a mutant  
167 frequency of about 1/20, which is dramatically less than the expected percentage for a single  
168 recessive mutation (1/4). A plausible explanation for the observed low percentage of mutants in  
169 the F2 population is that some mutants were lost because some mutant seeds could not  
170 germinate. Since phenotypic variation was also observed in the original mutant, albeit to a lesser  
171 extent, another explanation is that the mutation has incomplete penetrance; yet, another  
172 possibility is that there are other mutations that interact with the causal mutation, and these  
173 modifiers could alter the mutant/wildtype ratio in the F2 segregation population.

174

175 2. The gene with the causal mutation in our mutant is *TEN1/MDOI*

176 To distinguish among the possibilities described above and, more importantly, to determine  
177 whether the mutant phenotype can be attributed to a major allele, we performed an SSLP (Simple  
178 Sequence Length Polymorphism) analysis with an F2 segregation population resulting from a  
179 cross between the mutant and the wild type in the *Ler* background. This analysis was first  
180 conducted with 44 mutant seedlings showing a clear SCN defect phenotype, using 14 markers  
181 that are located in different regions of each of the five chromosomes. Only markers F28J9A on  
182 chromosome one showed a recombinant rate significantly less than 50%, suggesting that the  
183 causal mutation was located on this chromosome (Fig 2). To corroborate this conclusion, we  
184 analyzed the same population of mutants using two additional SSLP markers, NGA128 and  
185 T2K10. The recombinant rate was 3.49% for T2K10, and 1.14% for NGA128. These results  
186 suggest that the No. 74 mutant phenotype is most likely due to a recessive mutation in a single  
187 gene located near the NGA128 marker (Fig 2).



188 To pinpoint the location of the causal mutation, we next conducted whole genome  
189 resequencing with the mutants and their siblings from a F2 segregation population, as well as  
190 their parent lines. Bulk Segregant Analysis (see Methods for detail) clearly showed that the  
191 causal mutation is located in a region in chromosome one associated with NGA128 marker (Fig  
192 S2). This result is consistent with the genetic analysis described above, lending further support to  
193 the notion that the causal mutation in mutant 74 is within a single gene. To identify the gene with  
194 the causal mutation, we first searched the region defined by the BSA analysis for genes that  
195 harbor a G-to-A mutation that is characteristic of the EMS mutagenesis, and a SNP index value  
196 of one that indicates complete linkage between the mutated sites and causal mutation. Among the  
197 genes meeting these criteria, five genes were further investigated because they either contain  
198 nonsense mutations within their coding sequences (*ATIG53282*, *ATIG54030* (*ERMO3*) and  
199 *ATIG54350* (*ABCD2*)), or lost the start codon (*ATIG55720* (*CAX6*)) (Table S2). *ATIG56260*  
200 (*TEN1*) caught our attention as it has been previously identified as *MERISTEM*  
201 *DISORGANIZATION 1* (*MDOI*), which plays an essential role in SCN maintenance (Hashimura  
202 and Ueguchi, 2011; Leehy et al., 2013). Remarkably, our mutant had the same G-to-A mutation  
203 in the 77<sup>th</sup> codon as the *mdo1-1* mutant (Leehy et al., 2013), resulting in Gly to Glu substitution.  
204 Similarly to our mutant, the *mdo1-1* mutant affects SCR expression specifically in the SCN  
205 (Hashimura and Ueguchi, 2011). The *mdo1* mutant also resembles our mutant in many other  
206 respects, such as fasciated inflorescence stem and clustered flowers, as well as variable and  
207 incomplete penetrance of the mutant phenotypes (Hashimura and Ueguchi, 2011). We therefore  
208 postulated that the gene with the causal mutation in our mutant is very likely to be *MDOI*.  
209 Nevertheless, in complementation tests we have examined the function of all five candidate  
210 genes. In our first batch of transformations, however, we were unable to obtain any transgenic

211 plants, which we believe is attributable to the low fertility of the mutant that was aggravated after  
212 agrobacteria infiltration. Therefore we next transformed an F2 segregation population of plants  
213 from a cross between the mutant and Col-0. Our reasoning is that, if the mutant is rescued, none  
214 of the resulting transgenic plants would display the mutant phenotype; otherwise, 1/20 would be  
215 abnormal, which is the percentage of mutants we have observed in an F2 segregating population.  
216 As shown in Table 1, only AT1G56260 was able to complement the mutant. Hence, we conclude  
217 that our mutant is the same as *mdo1-1*.

218

219 3. TEN1/MDO1 has several conserved motifs essential to its function

220 TEN1 is a component of the so called CST complex that binds to and ensures the integrity  
221 of the telomere (Lim and Cech, 2021). The fact that our mutant has the same mutation (G77E) as  
222 the *mdo1* mutant underscores the critical importance of this amino acid residue to TEN1/MDO1  
223 function. Indeed, there is evidence that the G-to-E mutation caused protein instability in TEN1  
224 (Lim and Cech, 2021) and loss of TEN1's ability to interact with CTC, a scaffold protein  
225 essential for the assembly of the CST complex (Lim and Cech, 2021).

226 Underscoring its essential role in telomere integrity, TEN1 is found in all organisms that  
227 have linear chromosomes (Prochazkova Schrupfova et al., 2019). Bioinformatics analysis of  
228 *TEN1* homologs from a number of organisms, including yeast, plants and mammals, showed that  
229 G77 is located within a stretch of amino acid residues that are highly conserved in these organisms  
230 (Leehy et al., 2013). This motif was shown to be critical to TEN1 function, as the G77E mutation  
231 causes protein instability and loss of the ability to interact with STN1 (Leehy et al., 2013). The  
232 same analysis also revealed the presence of additional conserved motifs, but their functional  
233 importance has not been experimentally tested. To determine whether these additional motifs are

234 indispensable for TEN1 function in plants, we identified the most conserved amino acid residues  
235 in them by multi-sequence alignment of *TEN1* homologs from a wide spectrum of plants,  
236 ranging from primitive land plants to seed plants, as well as two algae species and the fission  
237 yeast (Table S3). Two amino acid residues were found to be present in all TEN1 homologs: one is  
238 an arginine at position 21 (R21), the other is a glycine at position 100 (G100) (Fig 3A).

239 To test the functionality of R21 and G100, we mutated the arginine to glycine (R21G) or  
240 glutamine (R21E), the glycine to glutamine (G100E), and then expressed the mutant forms as  
241 GFP-fusion proteins under the control of the *TEN1* promoter in the *TEN1* mutant. To circumvent  
242 the sterility issue of this mutant, we used the strategy described above (i.e., transforming F2  
243 plants from a cross between the mutant and the wild type, and calculating the percentage of  
244 transgenic plants still showing mutant phenotypes). The results showed that all but the protein  
245 containing the G100E mutation were able to fully rescue the mutant (Table 2). Since the number  
246 of seedlings containing the transgene and showing mutant phenotypes was the same as that  
247 expected based on the 1/20 frequency that is characteristic of our mutant, we conclude that the  
248 G100E mutation has completely abolished the function of the TEN1 protein. This result suggests  
249 that G100 and hence the corresponding motif is critical for TEN1 function.

250 The TEN1 protein is mainly localized in the nucleus (Leehy et al., 2013). Hence, it is  
251 possible that the G100E mutation could cause a change in subcellular localization. To test this  
252 possibility, we examined by confocal microscopy the subcellular localization of the GFP fusion  
253 proteins, with or without the G100E mutation, in root epidermal cells of the transgenic plants  
254 used for the complementation tests (*TEN1pro::TEN1-eGFP (G100E)* and *TEN1pro::TEN1-*  
255 *eGFP*). As expected, the TEN1-GFP protein was found mainly in the nucleus, but it appeared to  
256 be also present in the cytoplasm and even in plasma membrane (Fig 4A). Strikingly, we found

257 that the TEN1-GFP (G100E) protein was barely detectable, although it had the same subcellular  
258 localization as the wild type form (Fig 4, A and B). The low GFP fluorescence was unlikely due  
259 to the GFP tag, because the expression levels of the TEN1-GFP fusion proteins containing R21G  
260 (*TEN1pro::TEN1-eGFP (R21G)*) or R21E (*TEN1pro::TEN1-eGFP (R21E)*) were similar to that  
261 of TEN1-GFP ((Fig 4A).

262 The observed low fluorescence in the TEN1-eGFP (G100E) transgenic plants could be  
263 attributed to a low level of protein or to misfolding of the protein. To distinguish between these  
264 possibilities, we compared the protein level of the TEN1-GFP proteins with or without the  
265 G100E mutation by Western blot. As shown in Fig 4C, the mutated protein had a much lower  
266 level relative to the wild type GFP fusion protein. Since the G77E mutation is known to affect  
267 the physical interaction between TEN1 and STN1 (Leehy et al., 2013), we reasoned that the  
268 G100E mutation may have a similar effect, which would make the protein more vulnerable to  
269 degradation. Surprisingly, however, yeast two-hybrid assay indicated that the G100E mutant  
270 form was still able to interact with STN1 and the interaction was as strong as that between the  
271 wild type form and STN1 (Fig 5A). To validate this result, we tested their interaction further by  
272 bimolecular fluorescence complementation. As shown in Fig 5B, the G100E mutation did not  
273 affect the interaction between TEN1 and STN1. These results suggest that the low level of the  
274 G100E mutant form is not due to its dissociation from the CST complex. Consistent with the  
275 result from our confocal microscope observation (Fig 4A), TEN1-GFP was clearly detected in  
276 the plasma membrane and cytoplasm in addition to its nuclear localization (Fig 5B).

277 The steady-state level of TEN1 protein could be regulated by the ubiquitin–proteasome  
278 pathway and the G100E mutation may make it a better target for degradation. To test this  
279 hypothesis, we treated seedlings containing the *TEN1pro::TEN1-eGFP* or

280 *TEN1pro:TEN1(G100E)-eGFP* construct with the proteasome inhibitor MG132 and then  
281 examined GFP fluorescence by confocal microscopy. As negative controls, the R21G and R21E  
282 mutation forms were also included in this experiment. No apparent difference in fluorescence  
283 signal intensity was detected for any of these proteins before and after MG132 treatments (Fig  
284 S3). These results suggest that TEN1 is degraded by a mechanism unrelated to the ubiquitin-  
285 proteasome pathway.

286

287 4. Other telomere protecting factors also play a role in stem cell maintenance in the root

288 The finding that mutation in TEN1 causes SCN defect raises the question of whether other  
289 telomere integrity factors also have a role in stem-cell maintenance in the root. To address this  
290 question, we examined the SCN in mutants for the other components of the CST complex, CTC  
291 and STN1, as well as telomerase. Compared to the wild type, all mutants displayed a short and  
292 variable root phenotype (Fig6, A and B). Confocal microscopic imaging showed that in *ctc1* and  
293 *stn1* mutants the STN was severely disorganized with cells heavily stained by propidium dye,  
294 indicating cell damage (Fig 6C). Cell damage was also observed in two telomerase mutants, *tert1*  
295 and *tert-2*, although their SCN appear to be morphologically normal. These results suggest that  
296 telomere integrity is essential to stem cell maintenance.

297

298 5. SCR maintains the SCN by maintaining telomere integrity

299 The finding that mutation in TEN1 causes SCN defect raises the possibility that SCR may  
300 maintain the SCN by maintaining the expression level of TEN1 and other telomere protecting  
301 factors. To investigate this possibility, we first examined *TEN1* expression in the *scr* mutant by  
302 qRT-PCR. Indeed, we found that *TEN1* transcript level was dramatically reduced in the *scr-1*

303 mutant (Fig 7A). We also examined the expression pattern and level of TEN1 in the *scr* mutant  
304 using the *TEN1pro::TEN1-GFP* reporter construct. Consistent with the qRT-PCR result, we  
305 could barely detect any GFP signal in the SCN region in *scr* root (Fig 7B).

306 The SCN defect in the *scr* mutant is unlikely attributable only to the lower expression of  
307 TEN1, because *scr* has a much shorter root than *ten1*. We therefore also examined the transcript  
308 levels of STN1 and CTC1 as well as telomerase. As expected, all of these genes were found to be  
309 dramatically downregulated in *scr* (Fig 7C). These results suggest that SCR maintains the SCN  
310 by maintaining the integrity of chromosome ends.

311 Recently we showed that the *scr* mutant has a defect in redox homeostasis, which partly  
312 explains its shorter root phenotype (Fu et al., 2021). It is thus possible that the reduction in  
313 expression of telomerase and CST complex is an indirect consequence of an elevated level of  
314 reactive oxygen species in the mutant. To test this, we compared the transcript level of  
315 telomerase, *TEN1*, *STN1* and *CTC1* in wild-type seedlings grown in MS medium or H<sub>2</sub>O<sub>2</sub>-  
316 containing medium. As shown in Fig 7D, none of these genes was affected transcriptionally by  
317 H<sub>2</sub>O<sub>2</sub> at a concentrations of 500 uM and 1000 uM, which have apparent growth inhibitory  
318 effects but are still below the level causing cell death (Cui et al., 2014). This result lends support  
319 to the notion that SCR maintains the SCN by maintaining telomere integrity.

320 If the reduction in TEN1 expression is a cause for the SCN defect in the *scr* mutant, the *scr*  
321 mutant could have an elevated level of damaged DNA and thus becomes hypersensitive to  
322 conditions that elicit DNA damage. To see whether this is the case, we treated *scr* mutant and  
323 wild-type (Col) seedlings with zeocin, a reagent known to cause DNA damage. As shown in Fig  
324 8, *scr* seedlings became yellow at 20 ug/mL of zeocin and bleached at 50 ug/mL, whereas the  
325 wild type had no lesions. This result lends support to the notion that the *scr* mutant indeed has a

326 defect in genome stability. It further suggests that reduced expression of telomerase and the CST  
327 complex account, at least partially, for the SCN defect in the *scr* mutant.

328

329

330

## Discussion

331

332 Maintaining the SCN is essential to postembryonic growth and development in plants.  
333 Although SCR was identified as a key regulator of stem cell maintenance in *Arabidopsis* root  
334 more than two decades ago, the mechanism by which SCR maintains the root SCN has remained  
335 unclear. Serendipitously, in this study we discovered a connection between SCR and telomere  
336 protecting factors. In a genetic screen aimed to identify factors that regulate SCR expression, we  
337 uncovered a mutant that has lost SCR expression in the SCN, resulting in disorganized SCN and  
338 a short root phenotype. Through subsequent molecular analyses we were able to locate the causal  
339 mutation within *TEN1* that encodes a component of the telomere-end protecting CST complex.  
340 Because of the similar SCN defects in *ten1* and *scr* mutants, we wondered if altered *TEN1*  
341 expression and other telomere protecting factors could be a cause of the SCN defect in *scr*. We  
342 tested and corroborated this hypothesis by RT-PCR, which showed that telomerase and the three  
343 components of the CST complex, *TEN1*, *CTC1* and *STN1*, were all downregulated in *scr*. This  
344 change in gene expression is clearly not due to an elevated level of reactive oxygen species that  
345 accumulated in the *scr* mutant (Fu et al., 2021), because none of these genes was induced by  
346 hydrogen peroxide. These results together suggest that SCR maintains the SCN, at least partly,  
347 by sustaining optimal expression level of telomere protecting factors and thus ensuring telomere  
348 integrity. Supporting this conclusion, we demonstrated that the *scr* mutant was hypersensitive to  
349 Zeocin, a DNA damage reagent, which would be expected if telomere integrity is compromised.

350           The role of SCR in maintaining genome stability may not be limited to the telomere  
351 because one of its downstream targets, STN1, has been shown to interact with DNA polymerase  
352 alpha, an enzyme involved in genome replication (Derboven et al., 2014). In addition, there is  
353 evidence that individual components of the CST complex may have distinct functions that are  
354 currently not understood. For instance, protein subcellular location studies showed that in the  
355 nucleus TEN1 and CTC1 are enriched in many spots beyond the telomeres, which do not overlap  
356 (Leehy et al., 2013; Surovtseva et al., 2009). In the present study we found that TEN1 protein  
357 was even localized in the plasma membrane and cytoplasm (Fig 4A and E). These observations  
358 suggest that TEN1 is a multifunctional protein, which was also proposed in a recent study by  
359 others (Lee et al., 2016). Considering the fact that TEN1, CTC1 and STN1 are downregulated in  
360 *scr*, it is logical to postulate that SCR maintains the root SCN by ensuring genome stability at the  
361 genome scale.

362           In this study we also identified and functionally validated the indispensability of a  
363 conserved motif in TEN1. Through phylogenetic analyses of TEN1 homologs from a wide range  
364 of eukaryotes, we showed that three amino acid residues are present in all plants: R21, G77 and  
365 G100. The functional importance of G77 is underscored by the fact that it is exactly the same  
366 mutation in our mutant and the *mdo1* mutant (Leehy et al., 2013). To examine the functionality  
367 of R21 and G77, we substituted glutamic acid (E) or Alanine (A) using site-directed mutagenesis  
368 and expressed them in our mutant. Only the G100E mutation failed to complement the *ten1*  
369 mutant, indicating that G100 is critical for TEN1 function. Interestingly, in further experiments  
370 we showed that the TEN1 protein with the G100E mutation was barely detectable, although this  
371 mutation did not affect the physical interaction between TEN1 and STN1. These results strongly  
372 suggest that the motif containing G100 is required for protein stability, although how G100



373 exerts this role is still unknown. It is noteworthy that components in the CST complex interact  
374 not only with each other but also with other proteins, such POT1 (Renfrew et al., 2014) and  
375 DNA polymerase (Derboven et al., 2014). It is thus possible that this new motif is required for  
376 protein-protein interaction with other proteins, which warrants further investigation.

377

378

## Materials and Methods

379

### 380 1. Plant growth conditions and treatments

381 For root growth experiments, seedlings were grown aseptically in Murashige and Skoog  
382 (MS) medium supplemented with 1% sucrose and 0.6% Phytigel (Beijing BioDee Biotech,  
383 P8169) in square petri dishes, which were placed vertically in a Percival growth chamber (model  
384 41L). The growth conditions were 16-h light (50 micromoles/ m<sup>2</sup>/ sec of light irradiance) and 8-h  
385 darkness with a constant temperature of 22 °C. For this purpose, seeds were first sterilized with  
386 10% bleach, then washed thoroughly with sterile H<sub>2</sub>O before sowing. For bulking and  
387 experiments with above-ground organs, plants were grown in a growth room with the same  
388 settings as the growth chamber.

389 For chemical treatments, seedlings were first germinated and grown in 1x MS medium for  
390 6 days (for H<sub>2</sub>O<sub>2</sub>) or 8 days (for zeocin and MG-132, a peptide-aldehyde proteasome inhibitor).  
391 After transfer to the appropriate medium, seedlings were then allowed to growth for three hours,  
392 four or six days with MG-132 (MedChemExpress, HY-13259), H<sub>2</sub>O<sub>2</sub> or Zeocin (Coolaber,  
393 SL4140), respectively. As a control, a similar number of seedlings were also transferred to fresh  
394 MS medium and mock treated for the same amount of time.

395

### 396 2. EMS mutagenesis, mutant screen and characterization

397 Ethyl methanesulfonate (EMS) mutagenesis was conducted according to the Arabidopsis  
398 handbook (Weigel and Glazebrook, 2002). Approximately 20,000 seeds homozygous for the  
399 *SCRpro::GFP-SCR* transgene were treated overnight at room temperature with 10 mL 0.1%  
400 ethyl methanesulfonate (EMS, Sigma M0880, MO, USA). After thorough washing, the seeds  
401 were suspended in 0.01% agarose and sowed in soil (three to five seeds per pot). At maturity, the  
402 seeds (M0) from all the plants in each pot were pooled and numbered. For mutant screening, the  
403 root tip (~1 cm) of one-week-old seedlings grown in MS medium was cut and examined under a  
404 compound fluorescence microscope (Olympus BX61), and seedlings showing abnormal pattern  
405 or intensity of GFP fluorescence (M1) were transferred to soil for seed setting. Putative mutants  
406 were re-examined at the M2 generation and true mutants were crossed to *Ler* for subsequent  
407 genetic analyses and causal gene identification. For confocal microscopy, seedlings were stained  
408 for one minute with propidium iodide (Sigma, P-4170) dissolved in ddH<sub>2</sub>O at a concentration of  
409 10 µg/ml and images were captured using a Leica SP8 confocal microscope.

410

### 411 3. Genetic analysis and marker-assisted mapping of the causal genes in mutant 74

412 For this purpose, mutants in the F2 population from a cross between the mutant 74 (in the  
413 Col background) and *Ler* were selected based on the expression pattern of GFP fluorescence in  
414 the root tip. The percentage of seedlings showing loss of GFP-SCR expression was then  
415 calculated as a proxy for the penetrance of the mutant phenotype. To determine the chromosomal  
416 location, individual mutants were genotyped when they were one month old by PCR using SSLP  
417 markers. Primer information was retrieved from the Arabidopsis Information Resource (TAIR,  
418 <http://www.arabidopsis.org>) and is listed in Table S1. DNA was extracted using the CTAB  
419 method.

420

#### 421 4. High-throughput sequencing and BSA analysis

422 Three groups of plants were sequenced using the Illumina paired-end sequencing method  
423 on the HiSeq4000 platform: the same F2 mutant plants as described above for marker-assisted  
424 mapping (57 plants), normal F2 plants (30 plants), and the original mutant 74 (M2, 30 plants).  
425 An equal amount of leaf samples was collected from each plant, and the leaf samples were  
426 pooled for each group for DNA extraction using the TIANGEN DNA purification kit  
427 (TIANGEN, DP305-02). High-throughput sequencing and Bulk Sequence Analysis (BSA)  
428 were provided by a commercial service (Lianchuan Biotech Ltd., Hangzhou, China).

429 After removal of linker sequences, contamination and low-quality reads, 4.28 Gbp, 3.44  
430 Gbp and 2.12 Gbp valid sequence reads were obtained for the three groups of samples,  
431 respectively, corresponding to a coverage of 56.5X, 45.3X and 28.0X. After the sequence reads  
432 were mapped to the Arabidopsis genome using TAIR10  
433 (<https://www.arabidopsis.org/download/>), SNPs in the mutants were then identified by pairwise  
434 comparison, for which the genome sequence of *Ler* that we generated recently was also used as  
435 the reference (Li et al., 2020). For a particular mutated site, the ratio between the number of  
436 reads with that nucleotide and the total number of reads was calculated as the SNP index. Thus,  
437 the SNP\_index should be one for those sites that are completely linked to the causal mutation,  
438 and 0.33 for the normal F2 population. The Delta\_SNP\_index was then calculated by subtracting  
439 the SNP\_index for F2 normal form that for F2 mutants. Finally, SNPs with a Delta\_SNP\_index  
440 within the top 0.5% that also causes missense or nonsense mutation were selected as candidate  
441 causal mutations and the genes containing these SNPs were subject to further investigation.

442

## 443 5. Complementation tests

444 All genes tested in this study were expressed in mutant 74 under the control of their own  
445 promoters. For the promoter, the intergenic region up to 3kb, upstream of the first codon, was  
446 PCR amplified. For *ATIG54030*, *ATIG55720* and *ATIG56260*, the coding region was amplified  
447 from genomic DNA, whereas for *ATIG54350* the cDNA was used as the template. *ATIG53282*  
448 is an exception because of its small size: its promoter and coding region were amplified as a  
449 single piece using genomic DNA as the template. For the convenience of cloning, appropriate  
450 restriction sites were introduced into the primers used for the PCR amplification (Table S1).  
451 After digestion with corresponding enzymes and purification, PCR fragments were cloned into  
452 the pBluescript vector. Finally, clones whose sequences have been confirmed by Sanger  
453 sequencing were subcloned into the expression vector pCambia1305 or pCambia1302 (see Table  
454 S1 for the restriction sites used).

455 The construct for expressing TEN1-GFP fusion protein was generated in a similar manner  
456 to the clones above, except that the coding region was PCR amplified using the forward primer  
457 TEN1-F and a reverse primer that does not contain the stop codon (TEN1-R, Table S1). The GFP  
458 sequence in the expression vector was also retained and the two sequences were fused in frame.  
459 To construct GFP tagged mutant versions of TEN1, the point mutation was introduced by  
460 overlapping PCR. First, two fragments were separately amplified: a 5' fragment using TEN1-F  
461 and a reverse primer that contains the mutant nucleotide (Rm primers), and a 3' fragment using  
462 TEN1-R and a forward primer that contains the mutant nucleotide (Fm primers); The two PCR  
463 reactions were then mixed and subjected to PCR for five cycles; Finally, fresh TEN1-F and  
464 TEN1-R primers were added to this mix and PCR was allowed to run for 28 cycles.

465 For cloning described in this study, a high-fidelity DNA polymerase, PrimeSTAR® HS  
466 DNA Polymerase (Takara, R010A), was used for all PCR reactions. Transgenic plants were  
467 generated in the Col-0 ecotype using the flower dip method (Clough and Bent, 1998) and  
468 selected on MS medium containing kanamycin at a concentration of 50 µg/mL<sup>-1</sup>.

469  
470

## 471 6. Other molecular assays

### 472 6.1. RNA extraction and quantitative RT-PCR

473 Total RNA was extracted from the roots of 8-day seedlings using the Trizol reagent. After  
474 treatment with DNase I (Thermo Scientific, EN0521) to remove residual genomic DNA, the  
475 RNA was converted into cDNA using PrimeScript™ II 1st Strand cDNA Synthesis Kit  
476 (TAKARA, 6210A) following the instruction in the manual. The cDNA was then used as a  
477 template in subsequent real time PCR assay, for which Taq Pro Universal SYBR qPCR Master  
478 Mix (Vazyme, Q711-02) was used on an Bio-Rad CFX Connect real-time system. The primers  
479 used in the assay were CTC1-RT-F and CTC1-RT-R for CTC1, STN1-RT-F and STN1-RT-R for  
480 STN1, TEN1-RT-F and TEN1-RT-R for TEN1, TERT-RT-F and TERT-RT-R for TERT, and  
481 SCR-RT-F and SCR-RT-R for SCR. 18S rRNA was used as an internal control for most qRT-  
482 PCR reactions, except for the H<sub>2</sub>O<sub>2</sub>, where *ACTIN7* was used as the control. See Table S1 for  
483 information about the primers.

484

### 485 6.2 Yeast two-hybrid assay

486 The MATCHMAKER two-hybrid system 3 (<http://www.bdbiosciences.com>) was used for  
487 this experiment, whereby STN1 was used as the bait and TEN1 with or without the G100E  
488 mutation was used as the prey. The STN1 and TEN1 coding sequences were amplified by PCR

489 using cDNA made from wild type Col seedlings as the template, cut with EcoRI along with PstI  
490 or BamHI respectively, and then cloned into the corresponding sites of the GBKT7 or GADT7  
491 vectors. After confirmation by Sanger sequencing, the STN1-BD and TEN1-AD or TEN1-  
492 G100E-AD plasmids, as well as negative controls, were co-transformed into competent yeast  
493 cells (strain: YH109), and cells with both constructs were selected on SD/-Leu/-Trp medium  
494 (Clontech, 630417). Ten colonies picked up with a tooth pick were diluted in 1ml 0.9%NaCl and  
495 spotted onto SD/-Ade/-His/-Leu/-Trp medium (Clontech, 630428) with or without  $\alpha$ -X-Gal  
496 (GoldBio, 107021-38-5). See Table S1 for information about the primers.

497

### 498 6.3 Bimolecular fluorescence complementation

499 This assay was conducted essentially as described (Walter et al., 2004). TEN1 with or  
500 without the G100E mutation was fused to the N-terminal 155 amino acids of YFP, which were  
501 named as TEN1-YNE and G100E-YNE respectively, whereas STN1 was fused to the C-terminal  
502 86 amino acids of YFP, and the fusion protein was named as STN1-YCE. To make the TEN1-  
503 YNE or G100E-YNE expressing construct, TEN1 with or without the G100E mutation was PCR  
504 amplified using primers TEN1-BiFC-F and TEN1-BiFC-R (Table S1) and their clones described  
505 above as the templates, cut with BamHI and XhoI that had been introduced into the primers  
506 during primer synthesis, and cloned into the same restriction sites in the pSPYNE-35S vector.  
507 The STN1-YCE expressing construct was cloned into the pSPYCE-35S vector by introducing  
508 XbaI and XhoI into the coding region of STN1 by PCR using the STN1-BiFC-F and STN1-  
509 BiFC-R primer pair (Table S1). The plasmids for STN1-YCE and TEN1-YNE or G100E-TNE  
510 were then introduced together into Arabidopsis protoplasts prepared according to (Yoo et al.,  
511 2007), and YFP fluorescence as well as chlorophyll autofluorescence were then imaged using a

512 Leica TCS SP8 confocal microscope. As controls, a number of plasmid pairs were also co-  
513 transformed into the protoplast, including the YNE+YCE pair, TEN1-YNE+YCE, G100E-  
514 YNE+YCE, and YNE+STN1-YCE pairs.

515  
516 6.4. Western blot

517 Eight-day old seedlings grown in MS medium were used for this experiment. For each  
518 sample, 0.1 g of root cut 1cm from the tip was grounded in 300  $\mu$ L ice-cold protein extraction  
519 buffer (50mM Tris-HCl, pH7.5, 150 mM NaCl, 1% Triton X-100, 1 mM EDTA, 1X protease  
520 inhibitor cocktail, and 1 mM PMSF). After centrifugation (12,000 rpm, 4°C, 10 min.), the  
521 supernatant was mixed with SDS loading buffer, boiled for 5 min., and then loaded to 10% SDS-  
522 polyacrylamide gel for electrophoresis. The proteins were then transferred for 1 h to a PVDF  
523 membrane (MilliporeSigma™ ISEQ00010) using the semi-dry method, and the GFP fusion  
524 proteins were detected using the JL-8 (Clontech, 632380; 1:2500 dilution) as the primary  
525 antibody and an HRP-conjugated Affinipure Goat Anti-Mouse antibody (Proteintech, SA00001-  
526 1; 1:2500 dilution) as the secondary antibody. As a loading control, GAPDH was also detected  
527 using an antibody against it from Proteintech (60004-1-Ig; 1:20000 dilution). Signal was  
528 visualized using the ECL Western Blotting Reagent (Hyuan Biotech, HY005) and a  
529 chemifluorescence imaging system from Syngene (Gbox Chemi XRQ).

530

### 531 **Acknowledgements**

532

533 The authors are thankful to Jen Kennedy (Florida State University) for editing the  
534 manuscript. This research is supported by the National Science Foundation of China (grant no.  
535 31871493), Florida State University, and Northwest Agriculture and Forest University.

536

**Table 1. Summary of the complementation test results**

| Candidate gene | Number of transgenic plants examined | Number of mutants expected | Actual number of mutants observed |
|----------------|--------------------------------------|----------------------------|-----------------------------------|
| AT1G53282      | 134                                  | 7                          | 5                                 |
| AT1G54350      | 110                                  | 6                          | 7                                 |
| AT1G54030      | 246                                  | 12                         | 14                                |
| AT1G55720      | 205                                  | 10                         | 8                                 |
| AT1G56260      | 173                                  | 9                          | 0                                 |

537

538

Notes:

539

1. Number of T1 transgenic plants that show GFP fluorescence from the *SCRpro::GFP-SCR* reporter gene;

540

2. Number of plants lacking GFP fluorescence in QC;

541

3. Number of mutants expected based on a 1/20 ratio observed for this mutant.

542

543

**Table 2. Summary of results from the complementation tests for *TEN1* variants**

| Vector                     | Number of transgenic plants examined | Number of mutants expected | Number of mutants observed |
|----------------------------|--------------------------------------|----------------------------|----------------------------|
| <i>TEN1pro::TEN1-eGFP</i>  | 109                                  | 5                          | 0                          |
| <i>TEN1pro::R21G-eGFP</i>  | 115                                  | 6                          | 0                          |
| <i>TEN1pro::R21E-eGFP</i>  | 117                                  | 6                          | 0                          |
| <i>TEN1pro::G100E-eGFP</i> | 110                                  | 6                          | 6                          |

544

Notes:

545

1. Number of T1 transgenic plants that show GFP fluorescence from the *SCRpro::GFP-SCR* reporter gene;

546

2. Number of plants lacking GFP fluorescence in QC;

547

3. Number of mutants expected based on a 1/20 ratio observed for this mutant.

548

549



550 **Figure legends**

551

552 **Fig 1. Mutant 74 is defective in root stem cell maintenance.**

553 A. Diagram of the different developmental zones (upper panel) of Arabidopsis root and cell  
554 types (lower panel) in the apical root meristem.

555 B. Root length of 8-day-old seedlings. Representative image (B) and box plot (C).

556 \*\*\*\* represents  $p < 0.0001$ , *t*-test.

557 C. Confocal microscopy image showing the expression pattern of the *SCRpro::GFP-SCR*  
558 transgene in the roots of wild type and mutant 74. The seedlings were seven days old. Bar =  
559 20  $\mu\text{m}$ .

560

561 **Fig 2. SSLP-assisted mapping located the causal mutation in mutant 74 near the NGA128**  
562 **marker on chromosome one.**

563 The numbers on the left of each marker are the recombination frequency, and those below the  
564 markers (in the parenthesis) are their physical locations.

565

566 **Fig 3. Multi-sequence alignment of TEN1 homologs from a diverse range of eukaryotes.**

567 Arrows mark the position of the most-conserved amino acids, R21 and G100, as well as G77,  
568 which is mutated in the *mdo1-1/ten1-3* mutant. See Table S3 for the full names of the species and  
569 their corresponding taxonomy groups.

570

571 **Fig 4. G100 is essential to TEN1 protein expression.**

572 A. Representative confocal microscope images showing the expression of the different GFP  
573 fusion proteins. Bar = 50  $\mu\text{m}$ .

574 B. Box plot and statistical analysis of GFP signal intensity in the root tip of transgenic plants.

575 AU, artificial unit. \*\*\*\*  $p < 0.0001$ .  $t$ -test.  $n \geq 15$ .

576 C. Western blot assay showing the protein level of the TEN1-GFP fusion protein with the G100E

577 mutation (G100E-eGFP), relative to non-transgenic plants (Col), and the wild type TEN1-

578 eGFP fusion protein. GAPDH2 was used as a loading control

579

580 **Fig 5. G100E mutation does not affect physical interaction between TEN1 and STN1.**

581 A. Yeast two-hybrid assay showing that the G100E mutation does not affect the ability of TEN1

582 to interact with STN1. The SHR and SCR pair serves as the positive control. YNE, N-terminus

583 of YFP; YCE, C-terminus of YFP.

584 B. Bimolecular fluorescence complementation assay for the interaction between STN1 and

585 TEN1 with or without the G100E mutation.

586

587 **Fig 6. CTC1, STN1 and telomerase also play a role in SCN maintenance.**

588 A. Confocal microscope images showing disorganized SCN in *ctc1*, *stn1* and telomerase (*tert*)

589 mutants.

590 B. *ctc1*, *stn1* and two *tert* mutants have short roots. The seedlings were eight days old grown in

591 MS medium.

592 C. Box plots of root length of the root length of *ctc1*, *stn1* and two *tert* mutants.  $n=13$

593

594 **Fig 7. TEN1, CTC1, STN1 and telomerase are downregulated in the scr mutant.**

595 A. qRT-PCR assay of *TEN1* transcripts in the roots of wild type (Ws) and *scr* seedlings.

596 B. TEN1-eGFP protein level in wild type (WT) and *scr*, as determined by the intensity of  
597 green fluorescence.

598 C. Transcript levels of *CTC1*, *STN1* and telomerase (*TERT*) in the roots of wild type and *scr*  
599 seedlings.

600 D. qRT-PCR of *TEN1*, *CTCI*, *STN1* and telomerase in the roots of wild type seedlings with  
601 or without H<sub>2</sub>O<sub>2</sub> treatments.

602 For qRT-PCR, *actin 7* was used as an internal control.

603

604

605 **Fig 8. The *scr* mutant is hypersensitive to zeocin, a DNA damage reagent.**

606 A. Wild type (Col) and *scr* seedlings 22 days after germination in MS medium.

607 B and C. Wild type (Col) and *scr* seedlings 14 days after 8-days-old seedlings were transferred  
608 to MS medium containing 20 (B) or 50 (C) µg/mL zeocin.

609

## 610 References

611

612 Aida, M., Beis, D., Heidstra, R., Willemsen, V., Blilou, I., Galinha, C., Nussaume, L., Noh, Y.S.,

613 Amasino, R., and Scheres, B. (2004). The PLETHORA genes mediate patterning of the Arabidopsis  
614 root stem cell niche. *Cell* 119, 109-120.

615 Benfey, P.N., and Scheres, B. (2000). Root development. *Curr Biol* 10, R813-815.

616 Clough, S.J., and Bent, A.F. (1998). Floral dip: a simplified method for Agrobacterium-mediated  
617 transformation of *Arabidopsis thaliana*. *Plant J* 16, 735-743.

618 Cui, H., Kong, D., Wei, P., Hao, Y., Torii, K.U., Lee, J.S., and Li, J. (2014). SPINDLY, ERECTA, and  
619 Its Ligand STOMAGEN Have a Role in Redox-Mediated Cortex Proliferation in the Arabidopsis  
620 Root. *Mol Plant* 7, 1727-1739.

621 Cui, H., Levesque, M.P., Vernoux, T., Jung, J.W., Paquette, A.J., Gallagher, K.L., Wang, J.Y., Blilou, I.,  
622 Scheres, B., and Benfey, P.N. (2007). An evolutionarily conserved mechanism delimiting SHR  
623 movement defines a single layer of endodermis in plants. *Science* 316, 421-425.

- 624 Derboven, E., Ekker, H., Kusenda, B., Bulankova, P., and Riha, K. (2014). Role of STN1 and DNA  
625 polymerase alpha in telomere stability and genome-wide replication in Arabidopsis. *PLoS Genet* *10*,  
626 e1004682.
- 627 Di Laurenzio, L., Wysocka-Diller, J., Malamy, J.E., Pysh, L., Helariutta, Y., Freshour, G., Hahn, M.G.,  
628 Feldmann, K.A., and Benfey, P.N. (1996). The SCARECROW gene regulates an asymmetric cell  
629 division that is essential for generating the radial organization of the Arabidopsis root. *Cell* *86*, 423-  
630 433.
- 631 Dolan, L., Janmaat, K., Willemsen, V., Linstead, P., Poethig, S., Roberts, K., and Scheres, B. (1993).  
632 Cellular organisation of the Arabidopsis thaliana root. *Development* *119*, 71-84.
- 633 Fu, J., Zhang, X., Liu, J., Gao, X., Bai, J., Hao, Y., and Cui, H. (2021). A mechanism coordinating root  
634 elongation, endodermal differentiation, redox homeostasis and stress response. *Plant J* *107*, 1029-  
635 1039.
- 636 Hashimura, Y., and Ueguchi, C. (2011). The Arabidopsis MERISTEM DISORGANIZATION 1 gene is  
637 required for the maintenance of stem cells through the reduction of DNA damage. *Plant J* *68*, 657-  
638 669.
- 639 Helariutta, Y., Fukaki, H., Wysocka-Diller, J., Nakajima, K., Jung, J., Sena, G., Hauser, M.T., and  
640 Benfey, P.N. (2000). The SHORT-ROOT gene controls radial patterning of the Arabidopsis root  
641 through radial signaling. *Cell* *101*, 555-567.
- 642 Kobayashi, A., Miura, S., and Kozaki, A. (2017). INDETERMINATE DOMAIN PROTEIN binding  
643 sequences in the 5'-untranslated region and promoter of the SCARECROW gene play crucial and  
644 distinct roles in regulating SCARECROW expression in roots and leaves. *Plant Mol Biol* *94*, 1-13.
- 645 Lee, J.R., Xie, X., Yang, K., Zhang, J., Lee, S.Y., and Shippen, D.E. (2016). Dynamic Interactions of  
646 Arabidopsis TEN1: Stabilizing Telomeres in Response to Heat Stress. *Plant Cell* *28*, 2212-2224.
- 647 Leehy, K.A., Lee, J.R., Song, X., Renfrew, K.B., and Shippen, D.E. (2013). MERISTEM  
648 DISORGANIZATION1 encodes TEN1, an essential telomere protein that modulates telomerase  
649 processivity in Arabidopsis. *Plant Cell* *25*, 1343-1354.

- 650 Li, J., Wang, B., Zhu, X., Li, R., Fu, J., and Cui, H. (2020). Novel Regulators of Sugar-Mediated Lateral  
651 Root Development in *Arabidopsis thaliana*. *Genes* 11, 10.3390/genes11111257.
- 652 Lim, C.J., and Cech, T.R. (2021). Shaping human telomeres: from shelterin and CST complexes to  
653 telomeric chromatin organization. *Nat Rev Mol Cell Biol* 22, 283-298.
- 654 Long, Y., Goedhart, J., Schneijderberg, M., Terpstra, I., Shimotohno, A., Bouchet, B.P., Akhmanova, A.,  
655 Gadella, T.W., Jr., Heidstra, R., Scheres, B., *et al.* (2015a). SCARECROW-LIKE23 and  
656 SCARECROW jointly specify endodermal cell fate but distinctly control SHORT-ROOT movement.  
657 *Plant J* 84, 773-784.
- 658 Long, Y., Smet, W., Cruz-Ramirez, A., Castelijn, B., de Jonge, W., Mahonen, A.P., Bouchet, B.P.,  
659 Perez, G.S., Akhmanova, A., Scheres, B., *et al.* (2015b). Arabidopsis BIRD Zinc Finger Proteins  
660 Jointly Stabilize Tissue Boundaries by Confining the Cell Fate Regulator SHORT-ROOT and  
661 Contributing to Fate Specification. *Plant Cell* 27, 1185-1199.
- 662 Moreno-Risueno, M.A., Sozzani, R., Yardimci, G.G., Petricka, J.J., Vernoux, T., Blilou, I., Alonso, J.,  
663 Winter, C.M., Ohler, U., Scheres, B., *et al.* (2015). Transcriptional control of tissue formation  
664 throughout root development. *Science* 350, 426-430.
- 665 Moubayidin, L., Di Mambro, R., Sozzani, R., Pacifici, E., Salvi, E., Terpstra, I., Bao, D., van Dijken, A.,  
666 Dello Ioio, R., Perilli, S., *et al.* (2013). Spatial coordination between stem cell activity and cell  
667 differentiation in the root meristem. *Dev Cell* 26, 405-415.
- 668 Nakajima, K., Sena, G., Nawy, T., and Benfey, P.N. (2001). Intercellular movement of the putative  
669 transcription factor SHR in root patterning. *Nature* 413, 307-311.
- 670 Prochazkova Schrumppova, P., Fojtova, M., and Fajkus, J. (2019). Telomeres in Plants and Humans: Not  
671 So Different, Not So Similar. *Cells* 8, 58.
- 672 Renfrew, K.B., Song, X., Lee, J.R., Arora, A., and Shippen, D.E. (2014). POT1a and components of CST  
673 engage telomerase and regulate its activity in Arabidopsis. *PLoS Genet* 10, e1004738.
- 674 Sabatini, S., Heidstra, R., Wildwater, M., and Scheres, B. (2003). SCARECROW is involved in  
675 positioning the stem cell niche in the Arabidopsis root meristem. *Genes & Dev* 17, 354-358.

676 Sarkar, A.K., Luijten, M., Miyashima, S., Lenhard, M., Hashimoto, T., Nakajima, K., Scheres, B.,  
677 Heidstra, R., and Laux, T. (2007). Conserved factors regulate signalling in *Arabidopsis thaliana* shoot  
678 and root stem cell organizers. *Nature* *446*, 811-814.

679 Shay, J.W., and Wright, W.E. (2019). Telomeres and telomerase: three decades of progress. *Nat Rev*  
680 *Genet* *20*, 299-309.

681 Shimotohno, A., Heidstra, R., Blilou, I., and Scheres, B. (2018). Root stem cell niche organizer  
682 specification by molecular convergence of PLETHORA and SCARECROW transcription factor  
683 modules. *Genes & Dev* *32*, 1085-1100.

684 Song, X., Leehy, K., Warrington, R.T., Lamb, J.C., Surovtseva, Y.V., and Shippen, D.E. (2008). STN1  
685 protects chromosome ends in *Arabidopsis thaliana*. *Proc Natl Acad Sci USA* *105*, 19815-19820.

686 Sozzani, R., Cui, H., Moreno-Risueno, M.A., Busch, W., Van Norman, J.M., Vernoux, T., Brady, S.M.,  
687 Dewitte, W., Murray, J.A., and Benfey, P.N. (2010). Spatiotemporal regulation of cell-cycle genes by  
688 SHORTROOT links patterning and growth. *Nature* *466*, 128-132.

689 Surovtseva, Y.V., Churikov, D., Boltz, K.A., Song, X., Lamb, J.C., Warrington, R., Leehy, K., Heacock,  
690 M., Price, C.M., and Shippen, D.E. (2009). Conserved telomere maintenance component 1 interacts  
691 with STN1 and maintains chromosome ends in higher eukaryotes. *Mol Cell* *36*, 207-218.

692 van den Berg, C., Willemsen, V., Hendriks, G., Weisbeek, P., and Scheres, B. (1997). Short-range control  
693 of cell differentiation in the *Arabidopsis* root meristem. *Nature* *390*, 287-289.

694 Walter, M., Chaban, C., Schutze, K., Batistic, O., Weckermann, K., Nake, C., Blazevic, D., Grefen, C.,  
695 Schumacher, K., Oecking, C., *et al.* (2004). Visualization of protein interactions in living plant cells  
696 using bimolecular fluorescence complementation. *Plant J* *40*, 428-438.

697 Weigel, D., and Glazebrook, J. (2002). *Arabidopsis: A Laboratory Manual*.

698 Welch, D., Hassan, H., Blilou, I., Immink, R., Heidstra, R., and Scheres, B. (2007). *Arabidopsis*  
699 JACKDAW and MAGPIE zinc finger proteins delimit asymmetric cell division and stabilize tissue  
700 boundaries by restricting SHORT-ROOT action. *Genes & Dev* *21*, 2196-2204.

701 Yoo, S.D., Cho, Y.H., and Sheen, J. (2007). Arabidopsis mesophyll protoplasts: a versatile cell system for  
702 transient gene expression analysis. Nat Protoc 2, 1565-1572.  
703

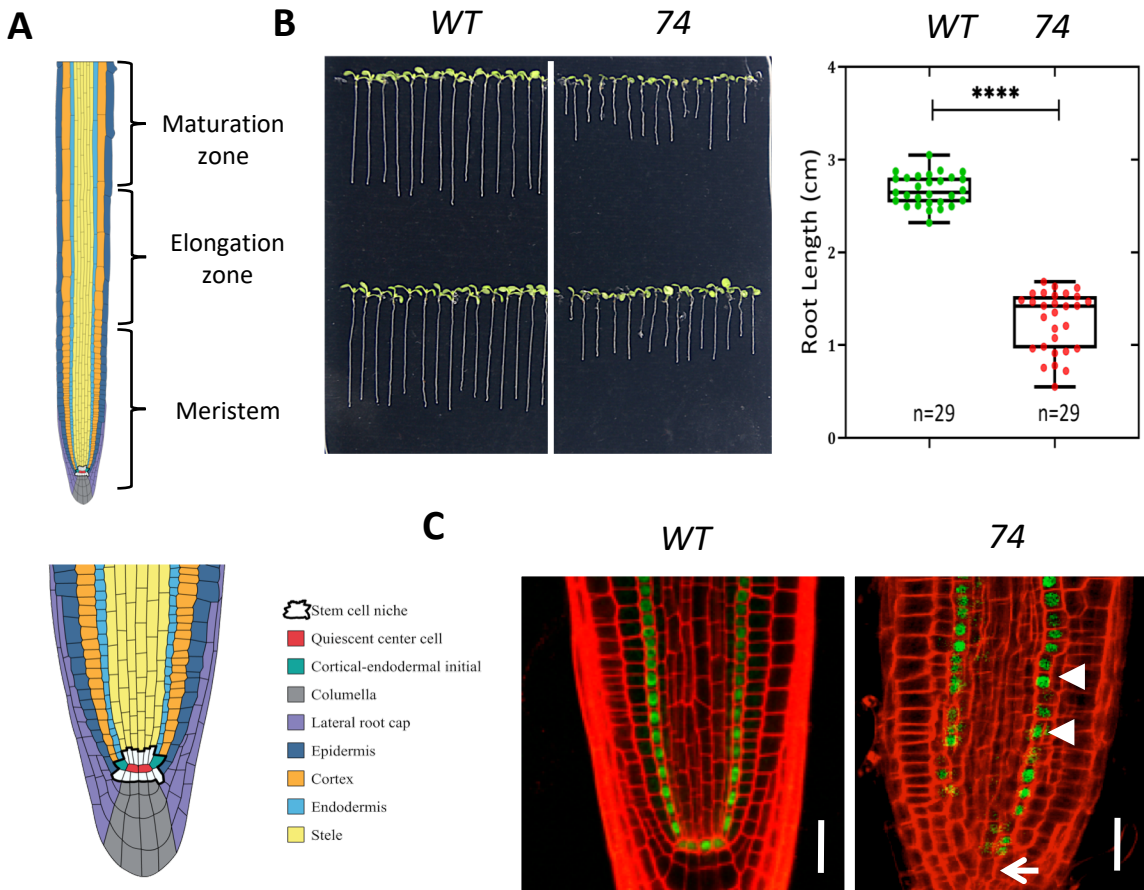

**Fig 1. Mutant 74 is defective in root stem cell maintenance.**

A. Diagram of the different developmental zones (upper panel) of Arabidopsis root and cell types (lower panel) in the apical root meristem. B. Root length of 8-day-old seedlings. Representative image (B) and box plot (C).

\*\*\*\* represents  $p < 0.0001$ ,  $t$ -test.

C. Confocal microscopy image showing the expression pattern of the *SCRpro::GFP-SCR* transgene in the roots of wild type and mutant 74. The seedlings were seven days old. Bar = 20  $\mu$ m.

Fig. 1



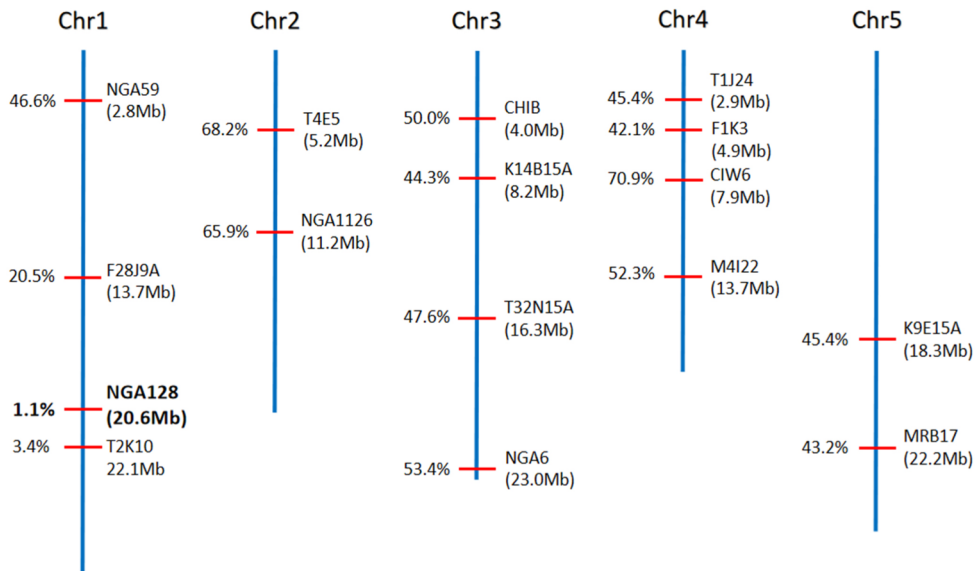

**Fig 2. SSLP-assisted mapping located the causal mutation in mutant 74 near the NGA128 marker on chromosome one.** The numbers on the left of each marker are the recombination frequency, and those below the markers (in the parenthesis) are their physical locations.

Fig. 2

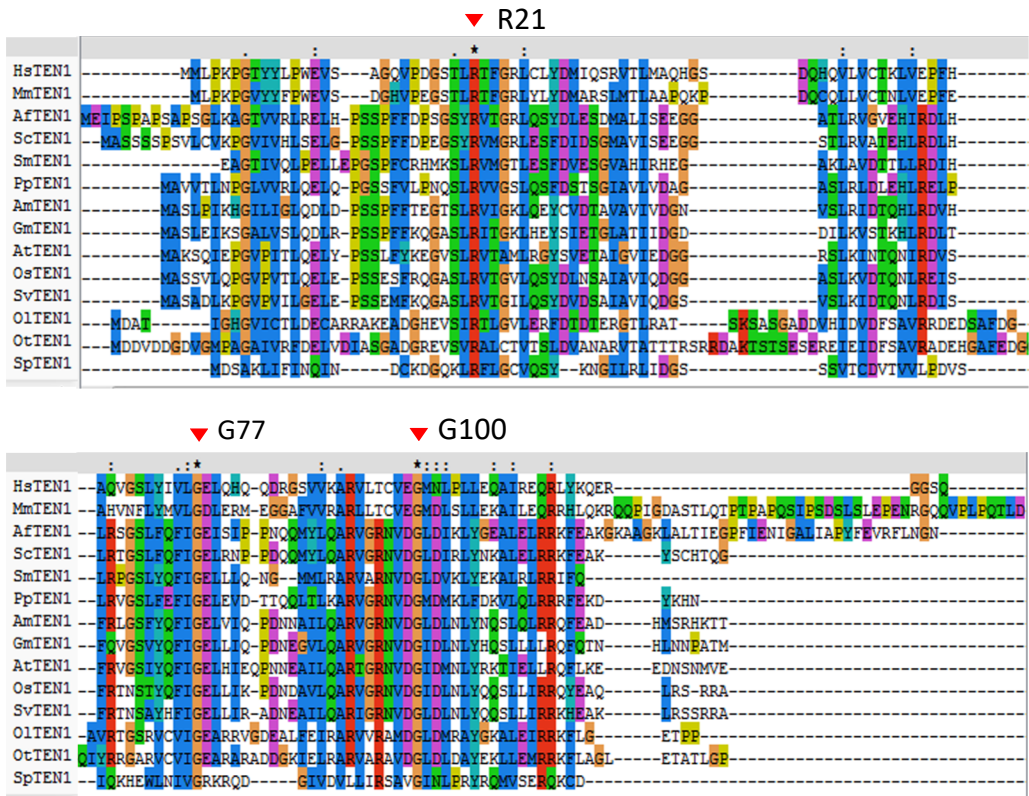

**Fig 3. Multi-sequence alignment of TEN1 homologs from a diverse ranges of eukaryotes.**

Arrows mark the position of the most-conserved amino acids, R21 and G100, as well as G77, which is mutated in the *mdo1-1/ten1-3* mutant. See Table S3 for the full names of the species and their corresponding taxonomy groups.

**Fig. 3**

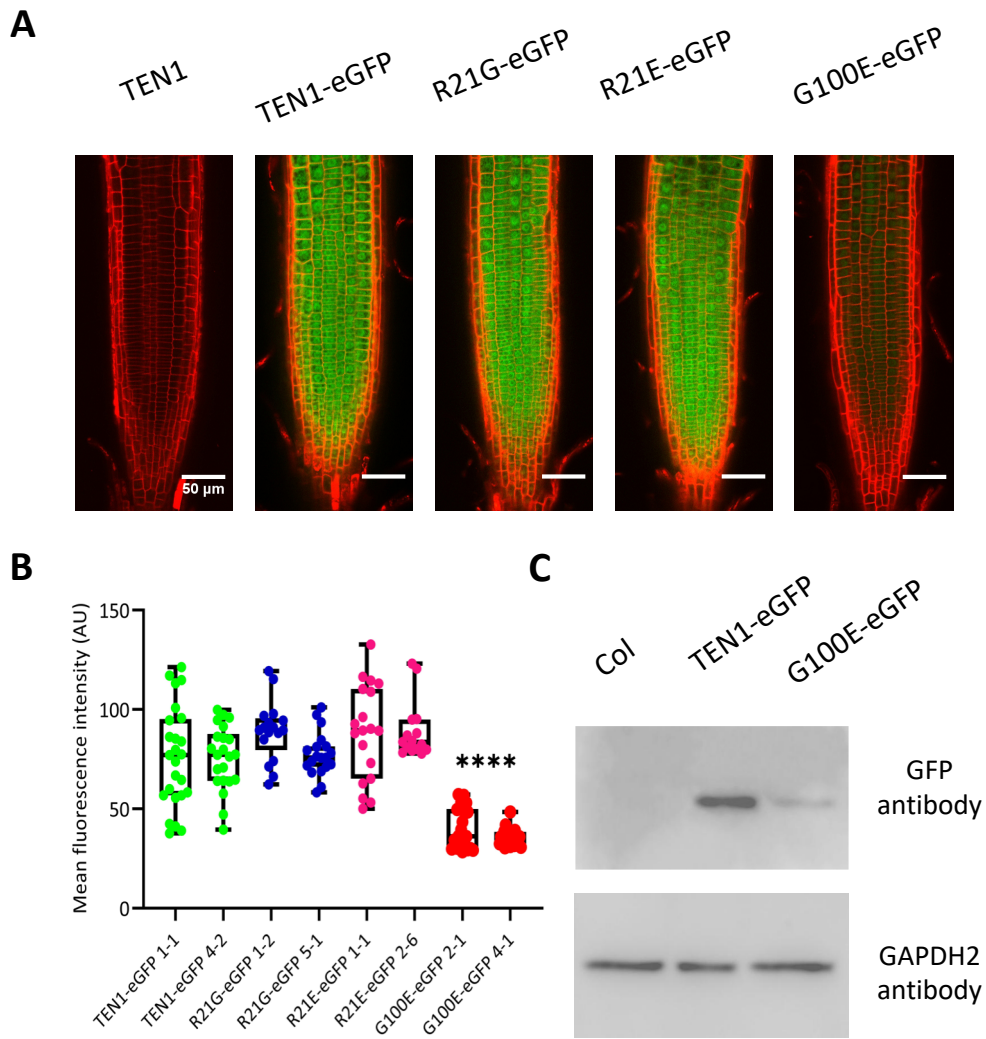

**Fig 4. G100 is essential to TEN1 protein expression.**

- A. Representative confocal microscope images showing the expression of the different GFP fusion proteins. Bar = 50  $\mu$ m.
- B. Box plot and statistical analysis of GFP signal intensity in the root tip of transgenic plants. AU, artificial unit. \*\*\*\*  $p < 0.0001$ .  $t$ -test.  $n \geq 15$ .
- C. Western blot assay showing the protein level of the TEN1-GFP fusion protein with the G100E mutation (G100E-eGFP), relative to non transgenic plants (Col), and the wild type TEN1-eGFP fusion protein. GAPDH2 was used as a loading control

Fig. 4

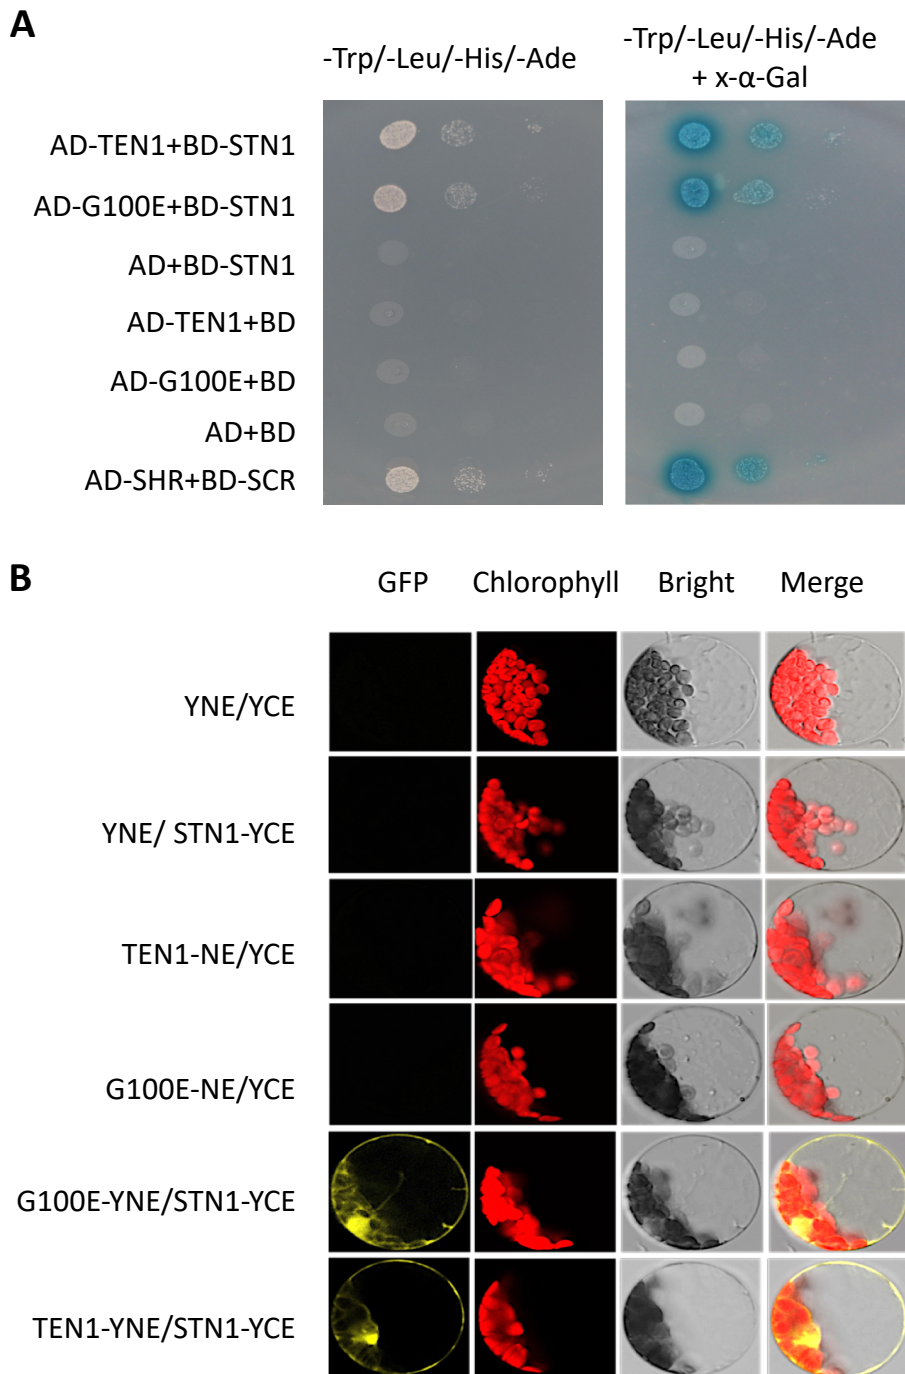

**Fig 5. G100E mutation does not affect physical interaction between TEN1 and STN1.**

A. Yeast two-hybrid assay showing that the G100E mutation does not affect the ability of TEN1 to interact with STN1. The SHR and SCR pair serves as the positive control. YNE, N-terminus of YFP; YCE, C-terminus of YFP.

B. Bimolecular fluorescence complementation assay for the interaction between STN1 and TEN1 with or without the G100E mutation.

**Fig. 5**

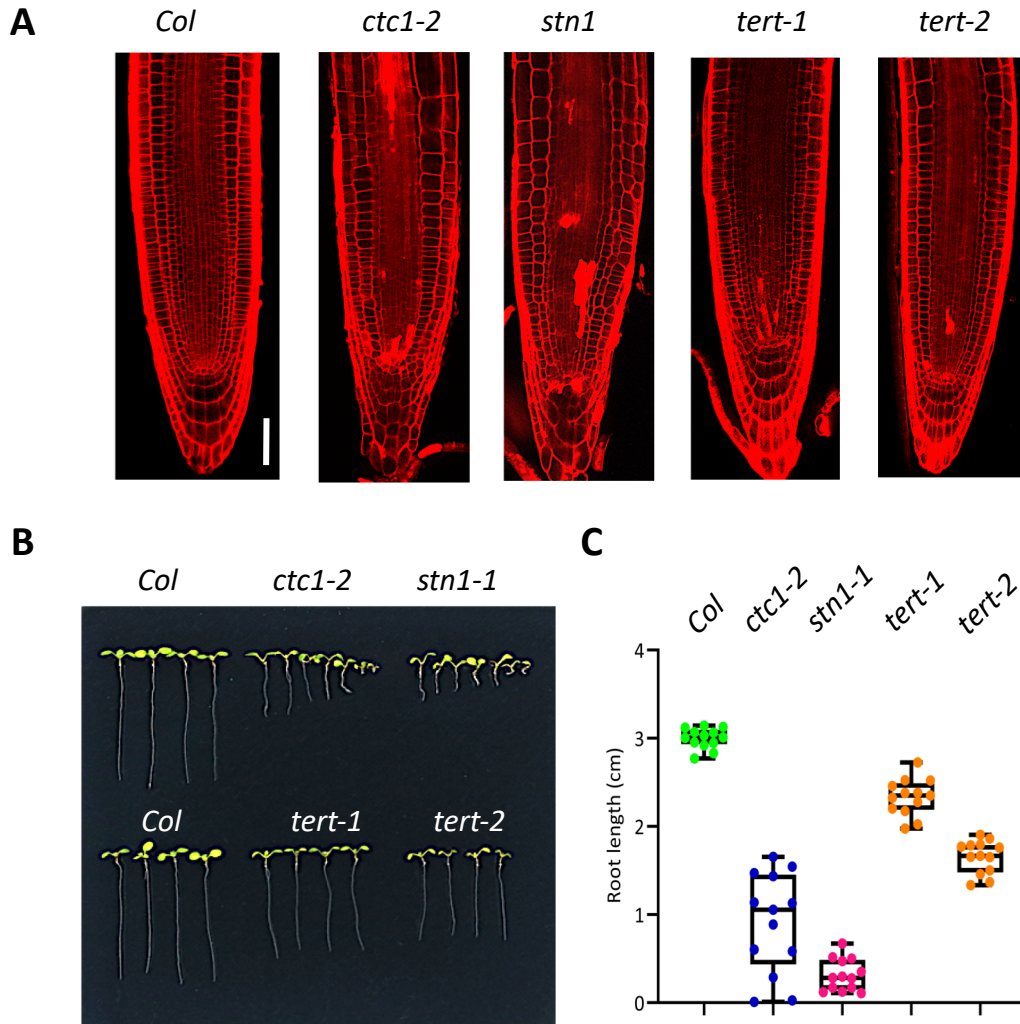

**Fig 6. CTC1, STN1 and telomerase also play a role in SCN maintenance.**

A. Confocal microscope images showing disorganized SCN in *ctc1*, *stn1* and telomerase (*tert*) mutants.

B. *ctc1*, *stn1* and two *tert* mutants have short root. The seedlings are eight days old grown in MS medium.

C. Box plots of root length of the root length of *ctc1*, *stn1* and two *tert* mutants. n=13

**Fig. 6**

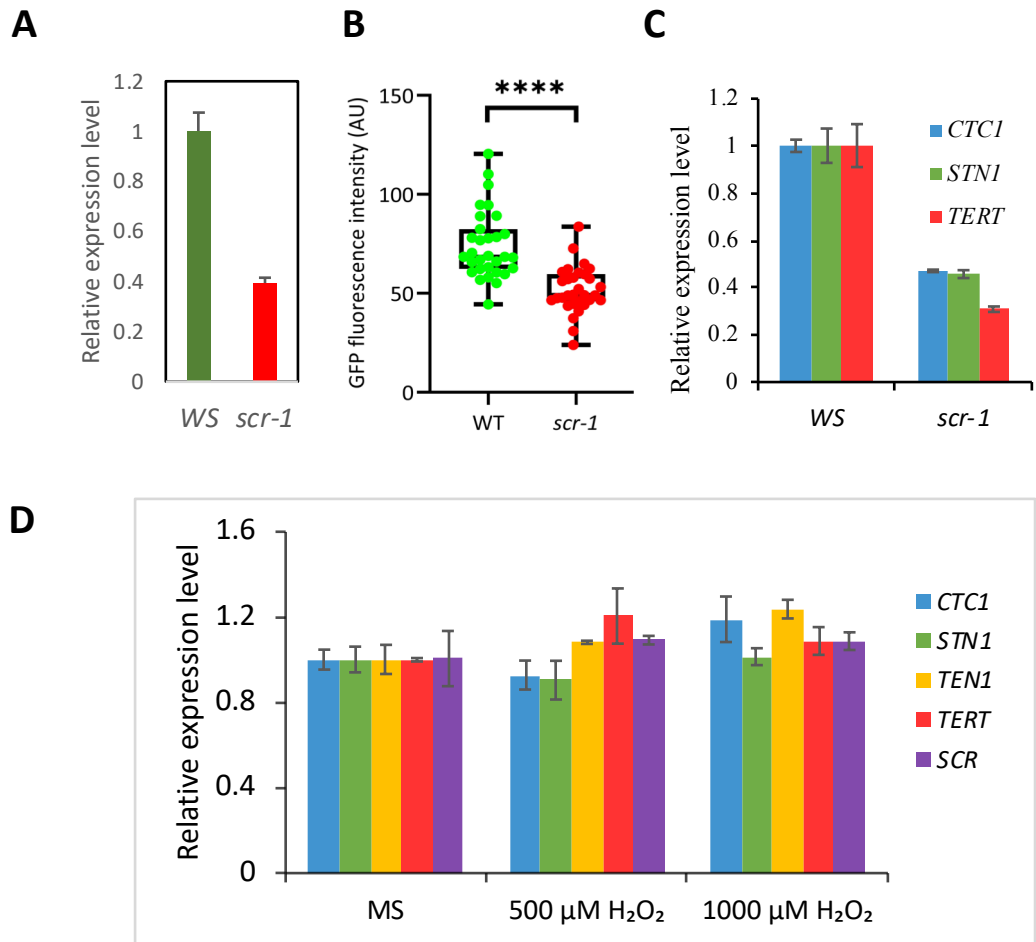

Fig 7. *TEN1*, *CTCI*, *STN1* and telomerase are downregulated in the *scr* mutant.

- qRT-PCR assay of *TEN1* transcripts in the roots of wild type (Ws) and *scr* seedlings.
  - TEN1*-eGFP protein level in wild type (WT) and *scr*, as determined by the intensity of green fluorescence.
  - Transcript levels of *CTCI*, *STN1* and telomerase (*TERT*) in the roots of wild type and *scr* seedlings.
  - qRT-PCR of *TEN1*, *CTCI*, *STN1* and telomerase in the roots of wild type seedlings with or without  $H_2O_2$  treatments.
- For qRT-PCR, *actin 7* was used as an internal control.

Fig. 7

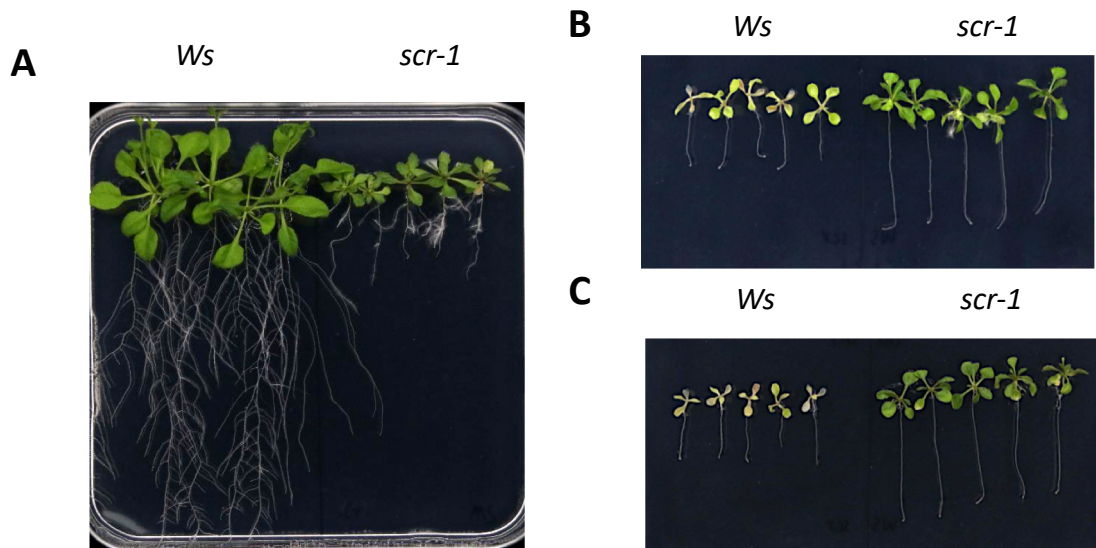

**Fig 8. The *scr* mutant is hypersensitive to zeocin, a DNA damage reagent.**  
A. Wild type (*Col*) and *scr* seedlings 22 days after germination in MS medium.  
B and C. Wild type (*Col*) and *scr* seedlings 14 days after 8-days-old seedlings were transferred to MS medium containing 20 (B) or 50 (C) µg/mL zeocin.
